# Supplementary material for: Parallel Bud Mutation Sequencing Reveals that Fruit Sugar and Acid Metabolism Potentially Influence Stress in Malus
Source: Int J Mol Sci. 2019 Nov 28;20(23):5988. doi: 10.3390/ijms20235988 (PMC6928686; doi:10.3390/ijms20235988)
Supplement: Supplementary file 1 [file ijms-20-05988-s001.zip › Supplementary Tables.xlsx]

## Sheet: Tabe S1
Table S1. Real-time quantitative PCR primer sequences primer sequences
Primers	sequence(5'-3')
MD15G1015400 (MdBPC6)	5' AATGGGAGTTTGATGGTTTGCT 3'
	5' ACCTGACCCTGAGCTGCTTTAT 3'
MD11G1093100 (MdPP2C)	5' ACGGTTGCTCCCACGTACTTAA 3'
	5' TGTTCTCCACTTCCTCCTTCACC 3'
MD05G1256300 (MdNPR1)	5' ACACCGAATGGATGACGACACT 3'
	5' AGGGGTGAGAAAGAGGTGAGAAAT 3'
MD10G1007300 (MdWRKY19)	5' CGACGACTCCCACCTAATCTGC 3'
	5' ACACCAGCCACCTACACCCAAA 3'
MD04G1200400 (MdWRKY16)	5' AGAAGTGAACCGGACGATGAGG 3'
	5' AATTTGTCACCGTGGAAGAACC 3'
MD05G1054800	5' CCTTTGGCGTCTGGAGAAGAAC 3'
	5' TGAGGTGAGTGATGGAGGGTAT 3'
MD00G1048400	5' CATCTCACTTCCCGTTCC 3'
	5' TGGTGATTTCGGTTTAGC 3'
MD00G1127500	5' CGGCGGAAGAAGGTGGTT 3'
	5' GGCAGACGAACGCAAAGG 3'
MD07G1160700	5' TATTTCCACCCTTCATTTCTTACC 3'
	5' CTCCTCCTTCCAGTCCTTCTCC 3'
MD17G1272200	5' CTTCTGCTGCTCCTGCTT 3'
	5' AATTGCCATCCTTTCCTG 3'

## Sheet: Table S2
Table S2. Whole genome sequencing data of 'Jonathan' and 'Sweet Jonathan'
Cultivar	Clean reads Number	Properly paired mapped reads number	Mapped Reads number	Map ratio
‘Jonathan’	342633631	298299522	338298783	0.987348
‘Sweet Jonathan’	364779402	305288410	354457221	0.971703
Sum	707413033	603587932	692756004	0.979281

## Sheet: Table S3
Table S3. Numbers of single nucleotide variants (SNVs) between 'Jonathan' and 'Sweet Jonathan'
Chromosome	SNPs	InDels	Length (no gaps)
Chr00	174843	11979	52728359
Chr01	182485	14634	32625452
Chr02	286174	21832	37577729
Chr03	316933	20929	37524076
Chr04	231992	16967	32301874
Chr05	323776	22984	47952461
Chr06	179824	15555	37137259
Chr07	298822	19076	36691129
Chr08	204543	14525	31609270
Chr09	166610	13840	37604908
Chr10	241076	19401	41762413
Chr11	287895	22917	43059885
Chr12	204958	16695	33050054
Chr13	152219	12899	44339518
Chr14	195781	16013	32513452
Chr15	279229	21517	54945402
Chr16	251062	19898	41389449
Chr17	220733	17833	34748701
Sum	4198955	319494	709561391

## Sheet: Table S4
Table S4. Functional annotation of single nucleotide variants (SNVs) between 'Jonathan' and 'Sweet Jonathan'
Functional region	InDel	Precentage	SNPs	Precentage
downstream	25562	0.0803397	252348	0.060318
exonic	6828	0.02146	204064	0.0487768
intergenic	177774	0.558732	2855008	0.682424
intronic	52021	0.163499	399331	0.095451
splicing	306	0.000961738	849	0.000202934
upstream	33183	0.104292	327187	0.0782066
upstream & downstream	4285	0.0134675	43752	0.0104579
UTR3	8362	0.0262812	65140	0.0155702
UTR5	9853	0.0309673	35946	0.00859207
total	318174	1	4183625	1

## Sheet: Table S5
Table S5. Functional variations in genes between 'Jonathan' and 'Sweet Jonathan'
Functional effect	Variation number	Affected gene number
Non-frameshift deletion	1802	1531
Frame-shift deletion	1622	1387
Stop-gain	2167	1779
Synonymous SNV	91531	23206
Frame-shift insertion	1243	1024
Nonsynonymous SNV	110031	24176
Nonframe-shift insertion	2041	1373
Stop-loss	455	441
Destructive mutation	5487	3872

## Sheet: Table S6
Table S6. Numbers of structure variations (SVs) between 'Jonathan' and 'Sweet Jonathan'
	DEL	INS	TRA	DUP	INV	Sum
Chr00	931	303	61	27	17	1339
Chr01	948	344	41	21	15	1369
Chr02	1422	490	82	43	15	2052
Chr03	1719	661	99	55	25	2559
Chr04	1162	394	92	27	8	1683
Chr05	1605	675	128	50	18	2476
Chr06	1021	325	106	25	7	1484
Chr07	1511	641	132	71	20	2375
Chr08	1032	351	114	37	21	1555
Chr09	937	326	107	39	10	1419
Chr10	1379	481	3	35	21	1919
Chr11	1550	538	0	56	13	2157
Chr12	1164	361	16	41	9	1591
Chr13	787	260	14	13	9	1083
Chr14	1016	394	35	16	5	1466
Chr15	1625	523	47	39	7	2241
Chr16	1381	486	60	29	19	1975
Chr17	1177	427	42	33	12	1691
Sum	22367	7980	1179	657	251	32434
Note: DEL: deletion; INS: insertion; INV: inversion; TRA: translocation

## Sheet: Table S7
Table S7. Functional annotation of big segment insertions and deletions between 'Jonathan' and 'Sweet Jonathan'
Functional region	Numbers	affected genes
downstream	3211	3740
exonic	1100	1035
intergenic	16759	0
intronic	4989	4105
splicing	59	53
upstream	3309	3701
upstream & downstream	459	872
UTR3	910	880
UTR5	474	475

## Sheet: Table S8
Table S8. Sequencing reads and reads mapping of RNA-sequencing
Cultivar	Stages	Replicate	Clean reads	Mapped reads	Unmapped reads	Mapped ration
Sweet Jonathan	30 DAB	replicate 1	13516791	13516791	3322354	0.877103
Sweet Jonathan	30 DAB	replicate 2	13818222	13818222	3235960	0.88291
Sweet Jonathan	30 DAB	replicate 3	14074887	14074887	3554763	0.87372
Jonathan	30 DAB	replicate 1	10224209	10224209	2741964	0.865908
Jonathan	30 DAB	replicate 2	12781152	12781152	2896343	0.886695
Jonathan	30 DAB	replicate 3	12645528	12645528	3019683	0.880603
Sweet Jonathan	90 DAB	replicate 1	17229530	17229530	4184662	0.878561
Sweet Jonathan	90 DAB	replicate 2	17751390	17751390	4360441	0.87718
Sweet Jonathan	90 DAB	replicate 3	13139998	13139998	3041501	0.884266
Jonathan	90 DAB	replicate 1	13587939	13587939	3405670	0.87468
Jonathan	90 DAB	replicate 2	13779706	13779706	3340147	0.878802
Jonathan	90 DAB	replicate 3	13336333	13336333	3818673	0.856832
Sweet Jonathan	140 DAB	replicate 1	12360297	13132727	3132727	0.880728
Sweet Jonathan	140 DAB	replicate 2	10457814	10457814	2666549	0.872509
Sweet Jonathan	140 DAB	replicate 3	20049519	20049519	5214605	0.869957
Jonathan	140 DAB	replicate 1	11288127	11288127	2484011	0.889972
Jonathan	140 DAB	replicate 2	12892354	12892354	3318590	0.871296
Jonathan	140 DAB	replicate 3	11886240	11886240	2659196	0.88814
Sum			244820036	245592466	60397839	0.877036
30 DAB: 30 days after bloom; 90 DAB: 90 days after bloom; 140 DAB: 140 days after bloom

## Sheet: Table S9
Table S9. Numberof transcrpts assembly from RNA-sequencing
Item	Number
Transcripts	90265
Multi-exon transcripts	75544
Gene loci	52854
Reference gene loci	6296
Transcripts in reference gene loci	46558

## Sheet: Table S10
Table S10. Gene expression distribution of all the assembled genes from RNA-sequencing
Layer	FPKM	Gene#	Accumulative gene number	Accumulative density
Layer1	0	8455	8420	0.159307
Layer2	0~1	22674	31129	0.588962
Layer3	1~2	3525	34654	0.655655
Layer4	2~3	2417	37071	0.701385
Layer5	3~4	1779	38850	0.735044
Layer6	4~5	1500	40350	0.763424
Layer7	5~6	1225	41575	0.786601
Layer8	6~7	1058	42633	0.806618
Layer9	7~8	900	43533	0.823646
Layer10	8~9	747	44280	0.83778
Layer11	9~10	679	44959	0.850626
Layer12	>10	7895	52854	1

[truncated: 18 more sheets: Table S11, Table S12, Table S13, Table S14, Table S15, Table S16, Table S17, Table S18, Table S19, Tabe S20, Table S21, Table S22, Table S23, Table S24, Table S25, Table S26, Table S27, Table S28]
